# Supplementary material for: Comparative proteomic analysis of spermatozoa isolated by swim-up or density gradient centrifugation
Source: Springer Nature journal article supplement (doi:10.1186/s12958-015-0027-y), 2015-04-18
Supplement: MOESM1 [file 9765348]

## Additional file 1, Supplementary information

Supporting data on protein identifications: Mascot search

### Spot #33

[gi|4504973](#) Mass: 36288 Score: 811 Matches: 32

(15) Sequences: 18(11) emPAI: 2.71

#### L-lactate dehydrogenase C chain [Homo sapiens]

Check to include this hit in error tolerant search

Query Observed Mr(expt) Mr(calc) ppm Miss Score Expect Rank Unique Peptide

|     |          |           |           |        |   |      |         |   |   |                          |
|-----|----------|-----------|-----------|--------|---|------|---------|---|---|--------------------------|
| 1   | 350.2243 | 698.4341  | 698.4439  | -14.00 | 0 | (42) | 0.036   | 1 | U | R.LALVQR.N               |
| 2   | 350.2259 | 698.4372  | 698.4439  | -9.56  | 0 | (33) | 0.27    | 1 | U | R.LALVQR.N               |
| 3   | 350.2277 | 698.4409  | 698.4439  | -4.30  | 0 | (29) | 0.56    | 1 | U | R.LALVQR.N               |
| 4   | 350.2351 | 698.4557  | 698.4439  | 16.9   | 0 | 43   | 0.019   | 1 | U | R.LALVQR.N               |
| 5   | 350.2441 | 698.4737  | 698.4439  | 42.7   | 0 | (12) | 16      | 1 | U | R.LALVQR.N               |
| 12  | 361.7110 | 721.4074  | 721.4010  | 8.80   | 0 | 34   | 0.22    | 1 | U | R.YLIGEK.L               |
| 19  | 380.2147 | 758.4148  | 758.4174  | -3.41  | 0 | 33   | 0.6     | 6 | K | EQLIEK.L                 |
| 20  | 380.2209 | 758.4272  | 758.4174  | 13.0   | 0 | (30) | 1       | 7 | K | EQLIEK.L                 |
| 38  | 409.2186 | 816.4226  | 816.4341  | -14.20 | 0 | 62   | 0.00055 | 1 | U | R.NGVSDVVK.I             |
| 39  | 409.2227 | 816.4309  | 816.4341  | -4.02  | 0 | (48) | 0.014   | 1 | U | R.NGVSDVVK.I             |
| 40  | 409.2228 | 816.4311  | 816.4341  | -3.75  | 0 | (43) | 0.045   | 1 | U | R.NGVSDVVK.I             |
| 48  | 421.7623 | 841.5100  | 841.5022  | 9.36   | 0 | 31   | 0.28    | 1 | U | K.ISGLPVTR.V             |
| 49  | 421.7798 | 841.5451  | 841.5022  | 51.0   | 0 | (8)  | 33      | 2 | U | K.ISGLPVTR.V             |
| 66  | 450.2874 | 898.5602  | 898.5600  | 0.28   | 0 | (40) | 0.041   | 1 | U | R.IVIVTAGAR.Q            |
| 67  | 450.2921 | 898.5696  | 898.5600  | 10.7   | 0 | 56   | 0.00072 | 1 | U | R.IVIVTAGAR.Q            |
| 87  | 499.2698 | 996.5251  | 996.5426  | -17.57 | 0 | 6    | 1.5e+02 | 2 | U | R.VHPVSTMVK.G            |
| 88  | 499.7297 | 997.4449  | 997.4465  | -1.59  | 0 | 45   | 0.01    | 1 | U | K.DYSVSANSR.I            |
| 89  | 499.7318 | 997.4490  | 997.4465  | 2.56   | 0 | (26) | 0.91    | 1 | U | K.DYSVSANSR.I            |
| 24  | 385.2263 | 1152.6572 | 1152.6438 | 11.7   | 1 | 30   | 0.71    | 1 | U | R.RVHPVSTMVK.G           |
| 25  | 385.2431 | 1152.7074 | 1152.6438 | 55.2   | 1 | (6)  | 1.1e+02 | 3 | U | R.RVHPVSTMVK.G           |
| 168 | 595.3064 | 1188.5982 | 1188.6139 | -13.15 | 0 | 63   | 0.00033 | 1 | U | K.SAETLWNIQK.D           |
| 245 | 646.3586 | 1290.7027 | 1290.7183 | -12.09 | 0 | 83   | 2.6e-06 | 1 | U | K.QVIQSAYEIK.L           |
| 55  | 439.2206 | 1314.6401 | 1314.6204 | 14.9   | 1 | 45   | 0.026   | 1 | U | K.LGTDS DKEHWK.N         |
| 56  | 439.2222 | 1314.6449 | 1314.6204 | 18.6   | 1 | (30) | 0.77    | 1 | U | K.LGTDS DKEHWK.N         |
| 57  | 439.2307 | 1314.6704 | 1314.6204 | 38.0   | 1 | (22) | 5.6     | 1 | U | K.LGTDS DKEHWK.N         |
| 58  | 439.9205 | 1316.7398 | 1316.7088 | 23.5   | 1 | 30   | 0.28    | 1 | U | K.KSAETLWNIQK.D          |
| 310 | 703.8605 | 1405.7065 | 1405.7089 | -1.70  | 0 | 66   | 8.2e-05 | 1 | U | K.INLNSEEEALFK.K         |
| 81  | 495.5886 | 1483.7440 | 1483.7267 | 11.7   | 1 | 67   | 5.2e-05 | 1 | U | K.ITSGKDYSVSANSR.I       |
| 97  | 512.2765 | 1533.8078 | 1533.8038 | 2.59   | 1 | (14) | 28      | 1 | U | K.INLNSEEEALFKK.S        |
| 98  | 512.2845 | 1533.8318 | 1533.8038 | 18.2   | 1 | 56   | 0.0017  | 1 | U | K.INLNSEEEALFKK.S        |
| 230 | 638.9737 | 1913.8992 | 1913.8652 | 17.8   | 0 | 43   | 0.01    | 1 | U | K.GEMMDLQHGS LFFSTSK.I   |
| 362 | 539.7818 | 2155.0980 | 2155.0442 | 25.0   | 1 | 16   | 3.4     | 1 | U | K.LKGEMMDLQHGS LFFSTSK.I |

### Spot #33

[gi|4503987](#) Mass: 35941 Score: 168 Matches: 6

(1) Sequences: 6(1) emPAI: 0.19

#### gamma-glutamyl hydrolase precursor [Homo sapiens]

Check to include this hit in error tolerant search

Query Observed Mr(expt) Mr(calc) ppm Miss Score Expect Rank Unique Peptide

|     |          |           |           |      |   |    |        |   |   |               |
|-----|----------|-----------|-----------|------|---|----|--------|---|---|---------------|
| 34  | 397.2071 | 792.3997  | 792.3806  | 24.1 | 0 | 18 | 13     | 1 | U | K.APYEWK.N    |
| 148 | 539.2861 | 1076.5577 | 1076.5542 | 3.24 | 0 | 52 | 0.0048 | 1 | U | R.YYIAASYVK.Y |

21 380.9226 1139.7459 1139.7100 31.5 0 28 0.43 1 U K.KPIIGILMQK.C  
63 445.9149 1334.7229 1334.6942 21.4 0 29 0.3 1 U K.NLDGISHAPNAVK.T  
92 501.5905 1501.7497 1501.7354 9.50 0 4 1.1e+02 3 U K.YPVYGVQWHPEK.A  
150 542.9669 1625.8789 1625.8552 14.6 1 37 0.055 1 U R.LDLTEKDYEILFK.S

**Spot #214**

gi|19743875 Mass: 54602 Score: 805 Matches: 25

(9) Sequences: 22(9) emPAI: 1.27

**fumarate hydratase, mitochondrial precursor [Homo sapiens]**

Check to include this hit in error tolerant search

**Query Observed Mr(expt) Mr(calc) ppm Miss Score Expect Rank Unique Peptide**

3 351.1955 700.3765 700.3868 -14.60 0 16 29 1 U K.IANDIR.F  
10 364.1799 726.3453 726.3371 11.3 0 28 1.1 1 U R.STMNFK.I  
12 366.2106 730.4067 730.3974 12.7 0 40 0.12 1 U K.IGGVTER.M  
13 367.2021 732.3897 732.3919 -2.96 0 31 0.82 1 U R.FLGSGPR.S  
14 367.2352 732.4558 732.3919 87.3 0 (11) 47 3 U R.FLGSGPR.S  
21 380.7225 759.4305 759.4313 -1.01 0 43 0.043 1 U K.IANAIMK.A  
22 380.7226 759.4307 759.4313 -0.80 0 (12) 52 5 U K.IANAIMK.A  
29 393.2337 784.4529 784.4517 1.54 0 27 1.6 1 U R.MPTPVIK.A  
33 402.7530 803.4915 803.5017 -12.71 1 26 1.1 1 U K.AFGILKR.A  
66 424.7412 847.4679 847.4803 -14.71 0 31 0.44 1 U K.EFAQIHK.I  
80 441.7292 881.4439 881.4607 -18.99 0 37 0.091 1 U K.LHDALDAK.S  
99 479.2453 956.4761 956.4716 4.76 0 60 0.00072 1 U K.YYGAQTVR.S  
6 355.2165 1062.6276 1062.6073 19.1 1 27 1.1 1 U K.SKEFAQIHK.I  
236 602.8156 1203.6167 1203.6169 -0.15 0 53 0.0026 1 U R.AIEMLG GELGSK.I  
240 607.8020 1213.5895 1213.5867 2.34 0 61 0.00035 1 U R.IEYDTFGELK.V  
65 423.9066 1268.6980 1268.6626 27.9 0 18 4.7 1 U K.IPVHPNDHVNK.S  
357 745.8580 1489.7014 1489.7049 -2.34 0 52 0.0022 1 U R.AAAEVNQDYGLDPK.I  
363 749.9079 1497.8013 1497.8555 -36.19 0 59 0.00042 1 U K.VAALTGLPFVTPAPNK.F  
114 500.2988 1497.8745 1497.8555 12.7 0 (23) 2.6 1 U K.VAALTGLPFVTPAPNK.F  
118 504.2712 1509.7917 1509.7576 22.6 1 54 0.0032 1 U K.VPNDKYYGAQTVR.S  
180 549.6156 1645.8250 1645.8060 11.6 1 12 15 1 U K.RAAAEVNQDYGLDPK.I  
219 588.6582 1762.9528 1762.9214 17.8 0 56 0.00045 1 U  
R.IYELAAGGTAVGTGLNTR.I  
220 589.9584 1766.8535 1766.8727 -10.85 1 42 0.013 1 U R.IEYDTFGELKVPNDK.Y  
341 709.0730 2124.1972 2124.0772 56.5 0 24 0.77 1 U  
R.SGLGELILPENEPGSSIMPGK.V  
378 849.4995 2545.4766 2545.2813 76.7 0 9 34 1 U  
R.THTQDAVPLTLGQEFSGYVQQVK.Y

**Spot #214**

gi|2282013 Mass: 45443 Score: 226 Matches: 11

(0) Sequences: 9(0) emPAI: 0.23

**GAPDH-2 like [Homo sapiens]**

Check to include this hit in error tolerant search

**Query Observed Mr(expt) Mr(calc) ppm Miss Score Expect Rank Unique Peptide**

5 352.1689 702.3233 702.3159 10.5 0 25 2.9 1 U R.YMFSR.D  
9 357.7361 713.4577 713.4436 19.8 0 32 0.18 1 U R.VVDLLR.Y  
30 398.2237 794.4328 794.4109 27.6 0 35 0.26 1 K.LTGMAFR.V  
206 579.8056 1157.5967 1157.6444 -41.27 0 25 1.5 1 U R.LAQAPAPYSAIK.E

207 581.2825 1160.5504 1160.6190 -59.06 0 33 0.29 1 U K.AGIALNDNFVK.L  
208 581.8235 1161.6325 1161.6142 15.7 0 30 0.48 1 U R.ELTVGINGFGR.I  
100 479.2600 1434.7582 1434.7579 0.18 0 21 5.2 1 U R.GAHQNIIPASTGAAK.A  
233 601.6241 1801.8505 1801.8060 24.7 0 (13) 11 1 U K.LISWYDNEYGYSHR.V  
234 601.6409 1801.9009 1801.8060 52.7 0 20 2 1 U K.LISWYDNEYGYSHR.V  
162 534.8030 2135.1831 2135.1779 2.43 0 (2) 2.9e+02 4 U  
R.EEIKPPPPPLPPHPATPPPK.M

**Spot #557**

gi|194377282 Mass: 65889 Score: 673 Matches: 24

(9) Sequences: 20(8) emPAI: 0.88

unnamed protein product [Homo sapiens] Blast searched: result = **pyruvate kinase M1/M2**

Check to include this hit in error tolerant search

**Query Observed Mr(expt) Mr(calc) ppm Miss Score Expect Rank Unique Peptide**

5 353.2114 704.4083 704.4221 -19.58 0 14 37 1 K.VFLAQK.M  
7 353.2203 704.4260 704.4221 5.47 0 (14) 30 1 K.VFLAQK.M  
15 366.1989 730.3833 730.3861 -3.83 0 21 8.1 1 K.DIQDLK.F  
39 420.7782 839.5419 839.5341 9.32 0 23 0.8 1 U R.SLLVRPR.S  
66 434.7449 867.4753 867.4749 0.47 0 30 0.46 1 R.MQHILIAR.E  
71 453.2632 904.5119 904.5018 11.2 0 41 0.054 1 U K.LFEELVR.A  
84 490.2603 978.5060 978.4957 10.5 0 56 0.0019 1 R.VNFAMNVGK.A  
87 495.7594 989.5042 989.5029 1.26 0 50 0.006 1 K.GSGTAEVELK.K  
100 510.3065 1018.5983 1018.5083 88.4 0 33 0.26 1 K.GDYPLEAVR.M  
108 517.2711 1032.5276 1032.5968 -67.02 1 17 15 1 U R.KLFEELVR.A  
142 531.2355 1060.4564 1060.4760 -18.51 0 (10) 54 2 U R.EAEAAMFHR.K  
9 354.5092 1060.5058 1060.4760 28.1 0 49 0.0042 1 U R.EAEAAMFHR.K  
10 354.5123 1060.5151 1060.4760 36.9 0 (48) 0.0045 1 U R.EAEAAMFHR.K  
19 373.5484 1117.6235 1117.5979 22.9 1 36 0.075 1 K.GSGTAEVELKK.G  
196 571.3087 1140.6028 1140.6026 0.17 0 49 0.0082 1 R.GDLGIEIPA EK.V  
229 599.3137 1196.6129 1196.6401 -22.70 0 (10) 58 1 R.LDIDSPPTAR.N  
231 599.3412 1196.6679 1196.6401 23.3 0 35 0.16 1 R.LDIDSPPTAR.N  
318 731.9021 1461.7896 1461.8079 -12.51 0 49 0.0039 1 K.IYVDDGLISLQVK.Q  
169 557.9502 1670.8286 1670.7649 38.2 0 54 0.00097 1 U K.GEHYVTGSPTPENQR.T  
216 589.0125 1764.0156 1763.9781 21.3 1 46 0.0066 1 K.KGVNLPGAAVDLPAVSEK.D  
225 594.0204 1779.0393 1778.8687 95.9 0 16 5.9 1 K.GADFLVTEVENGGSLGSK.K  
242 607.9679 1820.8820 1820.9091 -14.86 1 31 0.17 1 R.RFDEILEASDGIMVAR.G  
346 471.7423 1882.9403 1882.8962 23.4 0 3 94 1 R.LNFSHGTHEYHAETIK.N  
336 822.4335 2464.2787 2464.2849 -2.55 0 23 1.9 1  
R.TATESFASDPILYRPVAVALDTK.G
